# Supplementary material for: Impact of ruxolitinib on survival of patients with myelofibrosis in the real world: update of the ERNEST Study
Source: PubMed Central journal article supplement — Blood Adv. 2022 Jan 13;6(2):373–5. doi: 10.1182/bloodadvances.2021006006 (PMC8791590; doi:10.1182/bloodadvances.2021006006), 2022-01-13
Supplement: advancesADV2021006006-suppl1.pdf [file advancesADV2021006006-suppl1.pdf]

## Supplementary material

Table S1. Patients' demographics and clinical characteristics at diagnosis of myelofibrosis

| Variables                                                                   | N. non missing | Values      |
|-----------------------------------------------------------------------------|----------------|-------------|
| <b>Age, years, mean (SD)</b>                                                | 1,010          | 63.7 (12.7) |
| <b>Male sex, n (%)</b>                                                      | 1,010          | 605 (59.9)  |
| <b>Country, n (%)</b>                                                       | 1,010          |             |
| Italy                                                                       |                | 877 (86.8)  |
| Spain                                                                       |                | 82 (8.1)    |
| Sweden                                                                      |                | 51 (5.0)    |
| <b>Year of diagnosis, n (%)</b>                                             | 1,010          |             |
| 2001-2004                                                                   |                | 237 (23.5)  |
| 2005-2008                                                                   |                | 371 (36.7)  |
| 2009-2012                                                                   |                | 402 (39.8)  |
| <b>Type of MF, n (%)</b>                                                    | 1,010          |             |
| PMF                                                                         |                | 584 (57.8)  |
| PET-MF                                                                      |                | 207 (20.5)  |
| PPV-MF                                                                      |                | 219 (21.7)  |
| <b>IPSS score, n (%)</b>                                                    | 969            |             |
| Low                                                                         |                | 167 (17.2)  |
| Intermediate-1                                                              |                | 322 (33.2)  |
| Intermediate-2                                                              |                | 277 (28.6)  |
| High                                                                        |                | 203 (20.9)  |
| <b>MYSEC-PM score (only for secondary MF), n (%)</b>                        | 346            |             |
| Low                                                                         |                | 131 (37.9)  |
| Intermediate-1                                                              |                | 155 (44.8)  |
| Intermediate-2                                                              |                | 51 (14.7)   |
| High                                                                        |                | 9 (2.6)     |
| <b>Palpable spleen, n (%)</b>                                               | 821            | 665 (81.0)  |
| <b>Spleen length <math>\geq</math> 20cm (cm below costal margin), n (%)</b> | 623            | 33 (5.3)    |
| <b>Symptomatic disease at diagnosis, n (%)</b>                              | 922            | 451 (48.9)  |
| <b>Driver mutations, n (%)</b>                                              | 1,010          |             |
| JAK2 V617F                                                                  |                | 541 (69.4)  |
| MPL W515                                                                    |                | 37 (7.1)    |
| CALR                                                                        |                | 81 (30.6)   |
| Triple negative                                                             |                | 26 (10.1)   |
| <b>Laboratory values, n (%)</b>                                             |                |             |
| Presence of peripheral blood blasts, n (%)                                  | 928            | 231 (23.0)  |
| Blood blasts, median (IQR) $>$ 1%, n (%)                                    | 922            | 145 (15.7)  |
| Hemoglobin, median (IQR) $<$ 10 g/dl, n (%)                                 | 973            | 284 (29.2)  |
| WBC count, median (IQR) $>$ 25 $\times 10^9/L$ , n (%)                      | 969            | 103 (10.6)  |
| Platelets, median (IQR) $<$ 100 $\times 10^9/L$ , n (%)                     | 969            | 120 (12.4)  |
| <b>Support therapy, n (%)</b>                                               |                |             |

|                                        |     |           |
|----------------------------------------|-----|-----------|
| Splenic radiation                      | 750 | 2 (0.3)   |
| Corticosteroids                        | 744 | 70 (9.4)  |
| Immunomodulator (thalidomide)          | 730 | 10 (1.4)  |
| ESA (Erythropoiesis Stimulating Agent) | 734 | 28 (3.8)  |
| Androgens                              | 723 | 28 (3.9)  |
| Other                                  | 953 | 77 (8.1)  |
| Transfusion                            | 649 | 71 (10.9) |
| Chelation therapy                      | 36  | 2 (5.6)   |

Table S2. Characteristics of patients treated with Hydroxyurea and Ruxolitinib before and after Propensity Score (PS) matching

|                                                    | BEFORE 1:1 PS-MATCHING |                      |        | AFTER 1:1 PS-MATCHING |                     |      |
|----------------------------------------------------|------------------------|----------------------|--------|-----------------------|---------------------|------|
|                                                    | Hydroxyurea<br>N=487   | Ruxolitinib<br>N=108 | P      | Hydroxyurea<br>N=50   | Ruxolitinib<br>N=50 | P    |
| <b>Age at first administration</b>                 | 67.0 (57.0-74.0)       | 64.5 (56.0-70.5)     | 0.022  | 63.0 (53.0-69.0)      | 62.5 (56.0-69.0)    | 0.96 |
| <b>Male gender</b>                                 | 292 (60.0)             | 62 (57.4)            | 0.63   | 30 (60.0)             | 29 (58.0)           | 0.84 |
| <b>Type of MF</b>                                  |                        |                      |        |                       |                     |      |
| PMF                                                | 273 (56.1)             | 61 (56.5)            | 0.96   | 21 (42.0)             | 27 (54.0)           | 0.46 |
| PET-MF                                             | 91 (18.7)              | 21 (19.4)            |        | 10 (20.0)             | 7 (14.0)            |      |
| PPV-MF                                             | 123 (25.3)             | 26 (24.1)            |        | 19 (38.0)             | 16 (32.0)           |      |
| <b>History of thrombosis</b>                       |                        |                      |        |                       |                     |      |
| None                                               | 346 (75.1)             | 75 (78.9)            | 0.77   | 35 (70.0)             | 36 (81.8)           | 0.38 |
| Arterial                                           | 91 (19.7)              | 16 (16.8)            |        | 12 (24.0)             | 7 (15.9)            |      |
| Venous                                             | 21 (4.6)               | 4 (4.2)              |        | 3 (6.0)               | 1 (2.3)             |      |
| <b>Cardiovascular risk factors**</b>               | 181 (63.7)             | 67 (72.8)            | 0.11   | 22 (66.7)             | 29 (70.7)           | 0.71 |
| <b>DIPSS at first administration</b>               |                        |                      |        |                       |                     |      |
| Low                                                | 64 (13.6)              | 12 (11.4)            | 0.36   | 3 (6.0)               | 6 (12.0)            | 0.40 |
| Intermediate-1                                     | 188 (40.1)             | 48 (45.7)            |        | 19 (38.0)             | 20 (40.0)           |      |
| Intermediate-2                                     | 145 (30.9)             | 35 (33.3)            |        | 23 (46.0)             | 16 (32.0)           |      |
| High                                               | 72 (15.4)              | 10 (9.5)             |        | 5 (10.0)              | 8 (16.0)            |      |
| <b>Year of diagnosis</b>                           |                        |                      |        |                       |                     |      |
| 2001-2004                                          | 140 (28.7)             | 9 (8.3)              | <0.001 | 5 (10.0)              | 3 (6.0)             | 0.83 |
| 2005-2008                                          | 190 (39.0)             | 32 (29.6)            |        | 18 (36.0)             | 19 (38.0)           |      |
| 2009-2012                                          | 157 (32.2)             | 67 (62.0)            |        | 27 (54.0)             | 28 (56.0)           |      |
| <b>Spleen palpable at first administration</b>     | 368 (88.2)             | 93 (98.9)            | 0.002  | 50 (100.0)            | 49 (98.0)           | 0.31 |
| <b>Time from diagnosis to first administration</b> |                        |                      |        |                       |                     |      |
| Start within 2yrs from diagnosis                   | 383 (78.6)             | 26 (24.1)            | <0.001 | 22 (44.0)             | 24 (48.0)           | 0.69 |
| Start over 2yrs after diagnosis                    | 104 (21.4)             | 82 (75.9)            |        | 28 (56.0)             | 26 (52.0)           |      |

\*Chi-square test for categorical variables, Wilcoxon rank-sum test for continuous variables; \*\*At least one among active smoking, hypertension, diabetes mellitus or hypercholesterolemia
